# Supplementary material
Source: publisher figshare collection journal article supplement (https://tandf.figshare.com/ndownloader/files/14057135)
Supplement: Supplementary file 1 [file 14057135]

|  | Alcohol Status | | | Nicotine Status | | |
| --- | --- | --- | --- | --- | --- | --- |
|  | df | ANCOVA, *F* | *p* | df | ANCOVA, *F* | *p* |
| TMT A | 73 | 0.18 | 0.68 | 106 | 0.76 | 0.39 |
| TMT B | 72 | 0.22 | 0.64 | 104 | 0.30 | 0.59 |
| RVIP A | 68 | 1.37 | 0.25 | 96 | 0.39 | 0.54 |
| RVIP Latency | 62 | 0.39 | 0.53 | 89 | 0.24 | 0.63 |
| RAVLT Sum | 76 | 0.88 | 0.35 | 109 | 3.18 | 0.08 |
| RAVLT A7 | 76 | 1.06 | 0.31 | 108 | 1.76 | 0.19 |
| PAL Errors | 71 | 0.06 | 0.81 | 100 | 0.17 | 0.68 |
| RTI5 Movement | 65 | 0.71 | 0.40 | 90 | 2.09 | 0.15 |
| RTI5 Reaction Time | 65 | 0.02 | 0.89 | 90 | 0.97 | 0.33 |
| COWAT | 75 | 2.84 | 0.10 | 105 | 4.48 | **0.04** |

**Table 3**: Results (F statistic) of ANCOVA for PSY+CAN and PSY-CAN neurocognitive results, when controlling for (i) alcohol status or (ii) nicotine status. Bold values indicate comparisons that were significantly different between the PSY+CAN and the PSY-CAN groups.

*Note*: TMT = trail making test; RVIP = Rapid visual information processing; RAVLT = Rey auditory verbal learning test; PAL = Paired associates learning; RTI5 = Choice Reaction Time (5-choice); COWAT = Controlled Oral Word Association Test.
